# Supplementary material for: High flow oxygen and risk of mortality in patients with a suspected acute coronary syndrome: pragmatic, cluster randomised, crossover trial
Source: PubMed Central journal article supplement — BMJ. 2021 Mar 2;372:n355. doi: 10.1136/bmj.n355 (PMC7923953; doi:10.1136/bmj.n355), 2021-03-02
Supplement: ster060486.ww.pdf [file ster060486.ww.pdf]

## SUPPLEMENTARY APPENDIX

### Two oxygen protocols in patients presenting with a suspected acute coronary syndrome

Stewart RAH, et al

#### CONTENTS

|                                                                                                                                                                                        |   |
|----------------------------------------------------------------------------------------------------------------------------------------------------------------------------------------|---|
| 1. Study Oxygen protocols .....                                                                                                                                                        | 2 |
| 2. Data Monitoring Committee.....                                                                                                                                                      | 3 |
| 3. Participating centres and investigators.....                                                                                                                                        | 4 |
| 4. Supplementary Figure 1: New Zealand map showing 4 regions, and hospitals contributing to ANZACS-QI registry.....                                                                    | 5 |
| 5. Supplementary Table 1: 30 day all-cause mortality by oxygen protocol in selected groups .....                                                                                       | 6 |
| 6. Supplementary Table 2: Baseline characteristics of patients randomly selected for audit of oxygen use, compared to other ANZACS-QI patients admitted during the study periods ..... | 7 |

## 1. STUDY OXYGEN PROTOCOLS:

### High oxygen protocol:

- In patients with probable or confirmed acute coronary syndrome give oxygen for ischaemic chest pain, ischaemic ECG changes or dyspnea related to myocardial ischaemia irrespective of the measured oxygen saturation level.
- Administer oxygen by face mask at ~8l/minute. If a face mask is not tolerated give oxygen by nasal prongs at ~4 l/minute. Increase oxygen flow rate if necessary to achieve saturation  $\geq 95\%$ . Continue oxygen until the patient is admitted to hospital or transferred to cardiology, or when a doctor decides it is no longer necessary.
- Caution or avoid high flow oxygen in patients at risk of hypercapnia, including those with possible obesity hypoventilation syndrome or chronic obstructive pulmonary disease.

### Low oxygen protocol:

- In patients with a suspected or confirmed acute coronary syndrome do not give oxygen for ischaemic chest pain, ischaemic ECG changes or dyspnea related to myocardial ischaemia, unless the measured oxygen saturation is  $< 90\%$ .
- When the oxygen saturation cannot be measured only administer oxygen if there is a significant clinical concern of hypoxia.
- If oxygen is administered by face mask or nasal prongs adjust the flow rate to achieve a target oxygen saturation of 90 to 94%.
- Discontinue oxygen when no longer needed to maintain saturation  $> 90\%$ .
- Caution or avoid high flow oxygen in patients with possible obesity hypoventilation syndrome or chronic obstructive pulmonary disease.
- Oxygen can be administered in the ambulance to patients who need ventilation or continuous positive airways pressure (CPAP).

In individual cases the oxygen protocol can be over ruled by clinician preference or clinical indication.

## **2. DATA MONITORING COMMITTEE**

The Health Research Council of New Zealand Data Monitoring Committee (DMC) monitored trial conduct. The DMC meets in April and October each year. Aggregate data on oxygen protocol adherence, and in-hospital and 30 day mortality from the ANZACS-QI Registry were provided to the DMC once during the study, but no interim analysis was performed. The DMC were also provided with copies of relevant research published during the trial. The DMC did not review data from the Ambulance ACS pathway.

### **OXYGEN Data Monitoring committee (DMC) -The Health Research Council of New Zealand**

HRC DMC members: Associate Professor Katrina Sharples (Chair) - Department of Preventive and Social Medicine, University of Otago, Dunedin; Dr Mark Jeffery - Department of Oncology, Christchurch Hospital, Christchurch; Professor Ngaire Kerse - School of Population Health, University of Auckland; Professor Thomas Lumley - Department of Statistics, University of Auckland; Associate Professor Andrew Moore - Department of Philosophy, University of Otago, Dunedin; Associate Professor Conroy Wong - Department of Respiratory Medicine, Middlemore Hospital, Auckland.

### 3. PARTICIPATING CENTRES AND INVESTIGATORS

In addition to the study authors the following investigators and study coordinators contributed to the study.

#### **Investigators and Co-coordinators at participating hospitals:**

##### **Northern Region**

*Auckland City Hospital:* Ralph Stewart, Leah Howell, Catherine Patten, Peter Jones, Tracey Barley, Rebekka Costello, Karen Schimanski, Nancy Mitchell

*North Shore and Waitakere Hospitals:* Tony Scott, Nichola Bradford, Kim Yates, Laura Chapman

*Middlemore Hospital:* Andrew Kerr, Lynette Pearce, Renee Railton, Nicole Signal, Vanessa Thornton, Adrienne Adams, Andrew Brainard

*Whangarei Hospital:* Samraj Nandra, Sue Vallancey, Ryan Howard

##### **Midland Region**

*Waikato Hospital:* Gerry Devlin, Liz Low, Roselyn Pillay, John Bonning

*Tauranga Hospital:* Jonathan Tisch, Jennifer Goodson, Alastair Maclean

*Whakatane Hospital:* Terri McBride, Martin Bentley-Smith, Adele Ferguson

*Rotorua Hospital:* Peace Tamuno, Paula Broughton, Vijay Thumma

*Taupo Hospital:* Paul Malpass

*Gisborne Hospital:* Alyssa Thompson, Joanne Patterson, Andrew Botting, Tom Palfi

*Taranaki Base Hospital:* Ian Ternouth, Jonele Woodhead, Carolyn Jackson, Donald McKee, Mark Sagarin

*Tokoroa / Te Kuiti Hospital:* Shameem Safih

*Thames Hospital:* Vijaya Pera

##### **Central Region**

*Wellington Hospital:* Anil Ranchord, Bev Scott, Brad Peckler, Mark Hussey, Paul Quigley

*Nelson Hospital:* Liam Hughes, Sarah Flintoft, Liz Dalby, Lorna Johnston, Andrew Munro

*Hutt Valley Hospital:* Tim O'Meeghan, Ria Kleintjes, Jo-Anne Kovacs, Criselda Sayoc, Tracy Langhorn, Ben Ross, Tanya Wilton

*Hawkes Bay Hospital:* Richard Luke, Diana Schmid, Julia Mackenzie, Craig Ellis

*Palmerston North Hospital:* Dave Tang, Lia Sinclair, Thomas Cheri

*Wairarapa Hospital:* Laura Davidson, Mary Quayle

*Wanganui Hospital:* Tom Thompson

##### **Southern Region**

*Dunedin Hospital:* John Edmond, Shona Willers, Bruce Lambie, Deb Scott, Caroline Collins, John Chambers

*Christchurch Hospital:* David Smyth, Michael Hume, Martin Than

*Ashburton Hospital:* John Lyons

*Timaru Hospital:* Matthew Hills, Robyn Carey, Bernhard Kuepper, Maria Hammond, Catherine Baker, Kathy Patrick

**Wellington Free Ambulance:** Andrew Swain

**St John Ambulance:** Bridget Dicker, Tony Smith, Verity Todd

##### **National Oxygen Study Mangers:**

Darryl McGuire, Diana Gatland, Cardiovascular Research Unit, Auckland City Hospital

**4. SUPPLEMENTARY FIGURE 1: NEW ZEALAND MAP SHOWING 4 REGIONS AND HOSPITALS CONTRIBUTING TO ANZACS-QI REGISTRY**

All transfers between hospitals for patients with ACS occur within these four regions

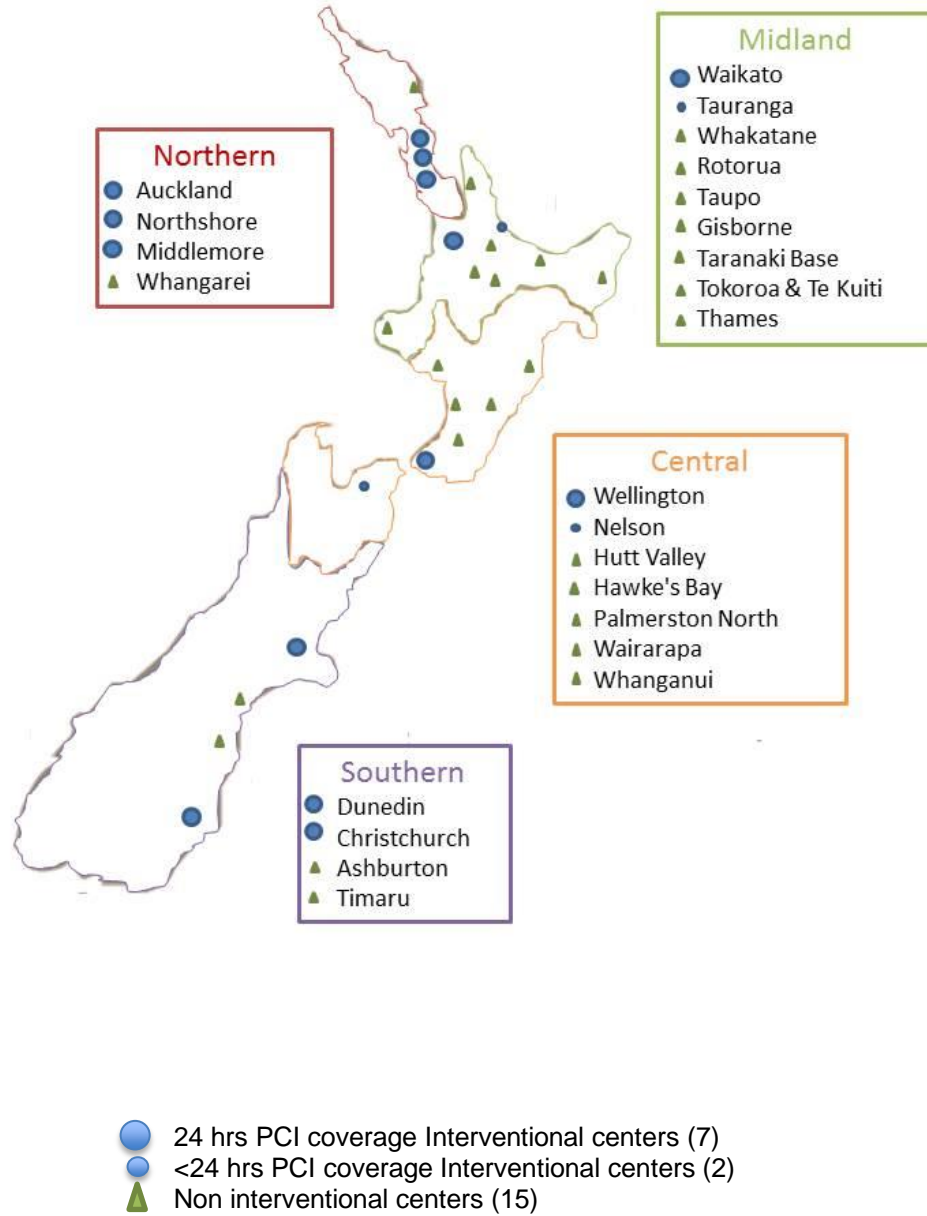

**Supplementary Table 1: 30-Day all-cause mortality by oxygen protocol in selected groups**

|                           | High oxygen<br>N (%) | Low oxygen<br>N (%) | OR (95%CI)<br>Unadjusted | P<br>value | OR (95%CI)<br>adjusted | P<br>value |
|---------------------------|----------------------|---------------------|--------------------------|------------|------------------------|------------|
| <b>All patients+</b>      | 20,304               | 20,568              | ..                       | ..         | ..                     | ..         |
| Mortality                 | 613 (3.0%)           | 642 (3.1%)          | 0.97 (0.86, 1.08)        | 0.55       | 0.96 (0.86, 1.08)      | 0.50       |
| <b>Men</b>                | 11777                | 11943               | ..                       | ..         | ..                     | ..         |
| Mortality                 | 364 (3.1%)           | 408 (3.4%)          | 0.90 (0.78, 1.04)        | 0.16       | 0.89 (0.77, 1.04)      | 0.14       |
| <b>Women</b>              | 8527                 | 8625                | ..                       | ..         | ..                     | ..         |
| Mortality                 | 249 (2.9%)           | 234 (2.7%)          | 1.08 (0.90, 1.29)        | 0.41       | 1.08 (0.90, 1.31)      | 0.42       |
| <b>Geographic region</b>  |                      |                     |                          |            |                        |            |
| <b>Northern</b>           | 6913                 | 7109                | ..                       | ..         | ..                     | ..         |
| Mortality                 | 175 (2.5%)           | 203 (2.9%)          | 0.88 (0.72, 1.09)        | 0.24       | 0.88 (0.71, 1.09)      | 0.23       |
| <b>Midland</b>            | 4815                 | 4916                | ..                       | ..         | ..                     | ..         |
| Mortality                 | 179 (3.7%)           | 163 (3.3%)          | 1.13 (0.91, 1.40)        | 0.28       | 1.12 (0.90, 1.40)      | 0.31       |
| <b>Central</b>            | 3658                 | 3836                | ..                       | ..         | ..                     | ..         |
| Mortality                 | 113 (3.1%)           | 138 (3.6%)          | 0.85 (0.66, 1.10)        | 0.22       | 0.87 (0.67, 1.13)      | 0.30       |
| <b>Southern</b>           | 4918                 | 4707                | ..                       | ..         | ..                     | ..         |
| Mortality                 | 146 (3.0%)           | 138 (2.9%)          | 1.01 (0.80, 1.28)        | 0.91       | 0.95 (0.75, 1.22)      | 0.71       |
| <b>ANZACS-QI registry</b> |                      |                     |                          |            |                        |            |
|                           | 9726                 | 9840                | ..                       | ..         | ..                     | ..         |
| Mortality                 | 286 (2.9%)           | 299 (3.0%)          | 0.97 (0.82, 1.14)        | 0.69       | 0.95 (0.80, 1.13)      | 0.58       |
| <b>Ambulance pathway+</b> |                      |                     |                          |            |                        |            |
|                           | 10,578               | 10,728              | ..                       | ..         | ..                     | ..         |
| Mortality                 | 327 (3.1%)           | 343 (3.2%)          | 0.97 (0.83, 1.13)        | 0.66       | 0.93 (0.79, 1.10)      | 0.38       |

**Legend:**+ patients on the ambulance ACS pathway who were not included in the ANZACS-QI registry

**Abbreviations:**

ACS - Acute Coronary Syndromes; STEMI- ST-elevation myocardial infarction; NSTEMI – Non ST-elevation myocardial infarction

**Supplementary Table 2: Baseline characteristics of patients randomly selected for audit of oxygen use, compared to other ANZACS-QI patients admitted during the study periods.**

|                                                   | ANZACS-QI |       | Audit cohort |       |
|---------------------------------------------------|-----------|-------|--------------|-------|
|                                                   | Number    | %     | Number       | %     |
| <b>All suspected ACS</b>                          | 18754     | 100.0 | 812          | 100.0 |
| Age <68 years                                     | 9819      | 52.4  | 420          | 51.7  |
| Age ≥68 years                                     | 8935      | 47.6  | 392          | 48.3  |
| Sex, male                                         | 12403     | 66.1  | 533          | 65.6  |
| <b>Ethnic group</b>                               |           |       |              |       |
| Māori                                             | 2295      | 12.2  | 94           | 11.6  |
| Pacific                                           | 913       | 4.9   | 40           | 4.9   |
| Asian                                             | 1463      | 7.8   | 60           | 7.4   |
| NZ European or Other                              | 14083     | 75.1  | 618          | 76.1  |
| <b>Clinical characteristics</b>                   |           |       |              |       |
| Prior myocardial infarction                       | 2363      | 12.6  | 101          | 12.4  |
| Prior heart failure                               | 1137      | 6.1   | 46           | 5.7   |
| <b>Charleson co-morbidity score (non-cardiac)</b> |           |       |              |       |
| 0                                                 | 14810     | 79    | 643          | 79.2  |
| 1-2                                               | 3156      | 16.8  | 139          | 17.1  |
| 3+                                                | 788       | 4.2   | 30           | 3.7   |
| Current Smoker                                    | 3237      | 17.3  | 149          | 18.4  |
| Diabetes                                          | 4398      | 23.5  | 207          | 25.5  |
| <b>Socioeconomic Status in Quintiles+</b>         |           |       |              |       |
| 1                                                 | 3061      | 16.3  | 112          | 13.8  |
| 2                                                 | 3175      | 16.9  | 152          | 18.7  |
| 3                                                 | 3652      | 19.5  | 142          | 17.5  |
| 4                                                 | 4329      | 23.1  | 195          | 24.0  |
| 5                                                 | 4347      | 23.2  | 198          | 24.4  |
| <b>Geographic region</b>                          |           |       |              |       |
| Northern                                          | 6041      | 32.2  | 251          | 30.9  |
| Midland                                           | 5457      | 29.1  | 238          | 29.3  |
| Central                                           | 3641      | 19.4  | 166          | 20.4  |
| Southern                                          | 3615      | 19.3  | 157          | 19.3  |
| <b>Final Diagnosis</b>                            |           |       |              |       |
| STEMI                                             | 3744      | 20.0  | 159          | 19.6  |
| NSTEMI                                            | 8991      | 47.9  | 381          | 46.9  |
| Unstable angina                                   | 2612      | 13.9  | 118          | 14.5  |
| Non-ACS condition                                 | 3407      | 18.2  | 154          | 19.0  |

**Legend:**

+ Socioeconomic status determined from NZDEP2013 census data in quintiles of the New Zealand general population.

**Abbreviations:**

ACS - Acute Coronary Syndromes; STEMI- ST-elevation myocardial infarction; NSTEMI – Non ST-elevation myocardial infarction
